# Supplementary material for: Genomic Insights of First ermB-Positive ST338-SCCmecVT/CC59 Taiwan Clone of Community-Associated Methicillin-Resistant Staphylococcus aureus in Poland
Source: MDPI journal article supplement (doi:10.3390/ijms23158755), 2022-08-06
Supplement: s1 [file s1]

**Table S2.** Antibiotic target genes and other resistance-associated genes and/or their regulatory regions, which gene variant or mutant or absence correlate with the manifestation of the resistance phenotype.

| Gene               | Gene product/ function/ KEGG code                               | Class of antibiotic               | Antibiotics                              | PubMed ID                   |
|--------------------|-----------------------------------------------------------------|-----------------------------------|------------------------------------------|-----------------------------|
| <i>alr</i>         | Alanine racemase (EC 5.1.1.1)                                   | Cycloserine                       | D-cycloserine                            | 19748470; 24303782          |
| <i>ddl</i>         | D-alanine--D-alanine ligase (EC 6.3.2.4)                        | Cycloserine                       | D-cycloserine                            | 24303782; 24033232          |
| <i>folP/dfrA</i>   | Dihydropteroate synthase (EC 2.5.1.15)                          | Sulfonamides                      | sulfamethoxazole, dapsone, sulfacetamide | 15673783                    |
| <i>fusA</i>        | Translation elongation factor G                                 | Fusidic acid                      | fusidic acid                             | 17980694                    |
| <i>gyrA</i>        | DNA gyrase subunit A (EC 5.99.1.3)                              | Quinolones                        | fluoroquinolones                         | 9293187                     |
| <i>gyrB</i>        | DNA gyrase subunit B (EC 5.99.1.3)                              | Quinolones                        | ciprofloxacin, levofloxacin              | 21693461; 22279180; 9293187 |
| <i>inhA, fabI</i>  | Enoyl-[acyl-carrier-protein] reductase [NADH] (EC 1.3.1.9)      | Isoniazid, Ethionamide, Triclosan | isoniazid, ethionamide, triclosan        | 18193820; 10869170; 8284673 |
| <i>iso-tRNA</i>    | Isoleucyl-tRNA synthetase (EC 6.1.1.5)                          | Mupirocin                         | mupirocin                                | 7929087                     |
| <i>kasA</i>        | 3-oxoacyl-[acyl-carrier-protein] synthase, KASII (EC 2.3.1.179) | Isoniazid, Triclosan              | isoniazid, triclosan                     | 10428945                    |
| <i>murA</i>        | UDP-N-acetylglucosamine 1-carboxyvinyltransferase (EC 2.5.1.7)  | Fosfomycin                        | fosfomycin                               | 8994972                     |
| <i>rho</i>         | Transcription termination factor Rho                            | Bicyclomycins                     | bicyclomycins                            | 8466900                     |
| <i>rpoB</i>        | DNA-directed RNA polymerase $\beta$ subunit (EC 2.7.7.6)        | Ansamycins                        | rifampicin                               | 3050121; 15047531; 16723576 |
| <i>rpoC</i>        | DNA-directed RNA polymerase $\beta'$ subunit (EC 2.7.7.6)       | Ansamycins                        | rifampicin                               | 16723576                    |
| <i>rpsJ</i> (S10p) | SSU ribosomal protein S10p (S20e)                               | Tetracyclines, Glycylcyclines     | tigecycline                              | 26124155; 26989065          |
| <b>EF-Tu</b>       | Translation elongation factor EF-Tu                             | Tetracyclines                     | tetracycline, minocycline, doxycycline   | 26989065                    |
| <b>S12p</b>        | SSU ribosomal protein S12p (S23e)                               | Aminoglycosides                   | streptomycin                             | 7934937                     |
| <i>parE</i>        | DNA topoisomerase IV subunit B (EC 5.99.1.3)                    | Quinolones                        | fluoroquinolones                         | 26190223                    |

|                    |                                                                                                            |                                     |                                        |                    |
|--------------------|------------------------------------------------------------------------------------------------------------|-------------------------------------|----------------------------------------|--------------------|
| <b><i>tcaA</i></b> | Membrane protein TcaA, teicoplanin resistance-associated                                                   | Glycopeptides                       | teicoplanin                            | 11042376;          |
| <b><i>tcaB</i></b> | Teicoplanin resistance transporter, TcaB family (TcaB)                                                     |                                     |                                        | 11150669;          |
| <b><i>tcaR</i></b> | Teicoplanin-resistance-associated HTH-type transcriptional regulator TcaR                                  |                                     |                                        | 11042376; 15060048 |
| <b><i>mepA</i></b> | Multi antimicrobial extrusion protein (Na <sup>+</sup> )/drug antiporter), MATE family of MDR efflux pumps | Tetracyclines, Glycylcyclines       | tigecycline                            | 29039719           |
| <b><i>mepR</i></b> | Transcriptional regulator, MarR family                                                                     |                                     |                                        |                    |
| <b><i>norA</i></b> | MFS-type transporter quinolone resistance protein NorA                                                     | Quinolones                          | ciprofloxacin, acriflavin, norfloxacin | 8431010; 2173911   |
| <b><i>arlR</i></b> | Putative response regulator ArlR                                                                           | $\beta$ -lactams,                   | oxacillin,                             | 30924407           |
| <b><i>arlS</i></b> | Two component system histidine kinase ArlS (EC 2.7.3.-)                                                    | Glycolipopeptides                   | oritavancin                            |                    |
| <b><i>mgrA</i></b> | Transcriptional regulator MgrA (regulator of autolysis)                                                    | $\beta$ -lactams, Glycolipopeptides | oxacillin, oritavancin                 | 19072553           |
| <b><i>gidB</i></b> | 16S rRNA (guanine(527)-N(7))-methyltransferase (EC 2.1.1.170)                                              | Aminoglycosides                     | streptomycin                           | 17238915           |
| <b><i>gdpD</i></b> | Glycerophosphoryl diester phosphodiesterase (EC 3.1.4.46)                                                  | Lipopeptides                        | daptomycin                             | 21899450           |
| <b><i>mprF</i></b> | L-O-lysylphosphatidylglycerol synthase (EC 2.3.2.3)                                                        | Lipopeptides                        | daptomycin                             | 19289517; 16723576 |
| <b><i>clsA</i></b> | Cardiolipin synthase, bacterial type ClsA                                                                  | Lipopeptides                        | daptomycin                             | 29082727           |
| <b><i>pgsA</i></b> | CDP-diacylglycerol--glycerol-3-phosphate 3-phosphatidyltransferase (EC 2.7.8.5)                            | Lipopeptides                        | daptomycin                             | 22238576           |
| <b><i>liaF</i></b> | Membrane protein LiaF (VraT), specific inhibitor of LiaRS (VraRS) signaling pathway                        | Lipopeptides                        | daptomycin                             | 21899450; 26020679 |
| <b><i>liaR</i></b> | Cell envelope stress response system LiaFSR, response regulator LiaR (VraR)                                |                                     |                                        |                    |
| <b><i>liaS</i></b> | Cell envelope stress response system LiaFSR, sensor histidine kinase LiaS (VraS)                           |                                     |                                        |                    |

Legend: KEGG - Kyoto Encyclopedia of Genes and Genomes
