# Supplementary material for: Genomic Insights of First ermB-Positive ST338-SCCmecVT/CC59 Taiwan Clone of Community-Associated Methicillin-Resistant Staphylococcus aureus in Poland
Source: MDPI journal article supplement (doi:10.3390/ijms23158755), 2022-08-06
Supplement: s1 [file s1]

**Table S3.** Virulence factor genes (VFG) detected in genome of analyzed MRSA SO574/12 strain.

| Function as VF               | Gene         | Product of the gene/ function                                                                        | Source database |
|------------------------------|--------------|------------------------------------------------------------------------------------------------------|-----------------|
| Adherence                    | <i>clfA</i>  | Clumping factor ClfA, fibrinogen-binding protein                                                     | VFG001289       |
|                              | <i>clfB</i>  | Clumping factor ClfB, fibrinogen-binding protein                                                     | VFG001290       |
|                              | <i>ebp</i>   | Elastin binding protein EbpS                                                                         | VFG001278       |
|                              | <i>map</i>   | Extracellular adherence protein of broad specificity Eap/Map                                         | VFG001799       |
| Adherence, biofilm formation | <i>icaA</i>  | Polysaccharide intercellular adhesin (PIA) biosynthesis N-glycosyltransferase IcaA                   | VFG001285       |
|                              | <i>icaB</i>  | Polysaccharide intercellular adhesin (PIA) biosynthesis deacetylase IcaB                             | VFG001287       |
|                              | <i>icaC</i>  | Polysaccharide intercellular adhesin (PIA) biosynthesis protein IcaC                                 | VFG001288       |
|                              | <i>icaD</i>  | Polysaccharide intercellular adhesin (PIA) biosynthesis protein IcaD                                 | VFG001286       |
|                              | <i>icaR</i>  | Biofilm operon <i>ica</i> ABCD HTH-type negative transcriptional regulator IcaR                      | VFG001284       |
| Adherence, MSCRAMMs          | <i>sdrC</i>  | Adhesin SdrC                                                                                         | VFG001279       |
|                              | <i>sdrE</i>  | Adhesin SdrE, similar to bone sialoprotein-binding protein Bbp                                       | VFG001281       |
| Antiphagocytosis             | <i>cap8A</i> | Capsular polysaccharide synthesis enzyme Cap5A/ Tyrosine-protein kinase transmembrane modulator EpsC | VFG001297       |
|                              | <i>cap8B</i> | Tyrosine-protein kinase EpsD/ Capsular polysaccharide synthesis enzyme Cap5B                         | VFG001298       |
|                              | <i>cap8C</i> | Capsular polysaccharide synthesis enzyme Cap5C; Manganese-dependent protein-tyrosine phosphatase     | VFG001299       |
|                              | <i>cap8D</i> | Probable polysaccharide biosynthesis protein EpsC                                                    | VFG001300       |
|                              | <i>cap8E</i> | UDP-N-acetylglucosamine 4,6-dehydratase                                                              | VFG001301       |
|                              | <i>cap8F</i> | Capsular polysaccharide synthesis enzyme Cap5F                                                       | VFG001302       |
|                              | <i>cap8G</i> | UDP-N-acetyl-L-fucosamine synthase                                                                   | VFG001303       |
|                              | <i>cap8H</i> | Capsular polysaccharide synthesis enzyme Cap8H                                                       | VFG001304       |
|                              | <i>cap8I</i> | Capsular polysaccharide synthesis enzyme Cap8I                                                       | VFG001305       |
|                              | <i>cap8J</i> | Maltose O-acetyltransferase                                                                          | VFG001306       |
|                              | <i>cap8K</i> | O-antigen flippase Wzx                                                                               | VFG001307       |

| Function as VF                              | Gene         | Product of the gene/ function                                                  | Source database |
|---------------------------------------------|--------------|--------------------------------------------------------------------------------|-----------------|
|                                             | <i>cap8L</i> | Capsular polysaccharide synthesis enzyme Cap5L                                 | VFG001308       |
|                                             | <i>cap8M</i> | Capsular polysaccharide synthesis enzyme Cap8M                                 | VFG001309       |
|                                             | <i>cap8N</i> | Capsular polysaccharide synthesis enzyme Cap8N                                 | VFG001310       |
|                                             | <i>cap8O</i> | UDP-N-acetyl-D-mannosamine dehydrogenase                                       | VFG001311       |
|                                             | <i>cap8P</i> | UDP-N-acetylglucosamine 2-epimerase                                            | VFG001312       |
| Exoenzyme, protease                         | <i>clpX</i>  | ATP-dependent Clp protease ATP-binding subunit ClpX                            | 15927253        |
| Exoenzyme, protease, stress protein         | <i>clpP</i>  | ATP-dependent Clp protease proteolytic subunit ClpP                            | VFG000077       |
| Exoenzyme, lipase                           | <i>geh</i>   | Lipase precursor                                                               | VFG001316       |
|                                             | <i>lip</i>   | Triacylglycerol lipase                                                         | VFG004773       |
| Exoenzyme, protease, cysteine protease      | <i>sspB</i>  | Staphopain B precursor                                                         | VFG001295       |
|                                             | <i>sspC</i>  | Staphostatin B                                                                 | VFG001294       |
| Exoenzyme, protease, serine protease        | <i>sspA</i>  | Glutamyl endopeptidase precursor, serine proteinase SspA                       | VFG001296       |
| Exoenzyme, protease, zinc metalloproteinase | <i>aur</i>   | Zinc metalloproteinase aureolysin                                              | VFG001314       |
| Exoenzyme, spreading factor                 | <i>hysA</i>  | Hyaluronate lyase precursor                                                    | VFG001315       |
| Immune evasion                              | <i>adsA</i>  | Virulence-associated cell-wall-anchored protein SasH, 5'-nucleotidase          | VFG002420       |
|                                             | <i>chp</i>   | Chemotaxis-inhibiting protein CHIPS, phage-associated                          | VFG002422       |
|                                             | <i>sbi</i>   | IgG-binding protein SBI                                                        | VFG002421       |
|                                             | <i>scn</i>   | Involved in expression of fibrinogen binding protein, phage-associated         | VFG002423       |
| Immune evasion, adherence                   | <i>spa</i>   | Protein A, von Willebrand factor binding protein Spa                           | VFG001313       |
| Iron uptake, heme uptake                    | <i>isdA</i>  | Cell surface protein IsdA, transfers heme from hemoglobin to apo-IsdC          | VFG001318       |
|                                             | <i>isdB</i>  | Cell surface receptor IsdB for hemoglobin and hemoglobin-haptoglobin complexes | VFG001317       |
|                                             | <i>isdC</i>  | NPQTN cell wall anchored protein IsdC                                          | VFG001319       |
|                                             | <i>isdD</i>  | Heme transporter IsdDEF, membrane component IsdD                               | VFG001320       |
|                                             | <i>isdE</i>  | Heme transporter IsdDEF, lipoprotein IsdE                                      | VFG001321       |
|                                             | <i>isdF</i>  | Heme transporter IsdDEF, permease component IsdF                               | VFG001322       |
|                                             | <i>isdG</i>  | Heme-degrading monooxygenase, staphylobilin-producing                          | VFG001324       |

| Function as VF                                                                                                                               | Gene            | Product of the gene/ function                                       | Source database |
|----------------------------------------------------------------------------------------------------------------------------------------------|-----------------|---------------------------------------------------------------------|-----------------|
|                                                                                                                                              | <i>srtB</i>     | NPQTN specific sortase B                                            | VFG001323       |
| Secretion system, type VII secretion system                                                                                                  | <i>esaA</i>     | Putative secretion accessory protein EsaA/YueB, phage SPP1 receptor | VFG002406       |
|                                                                                                                                              | <i>esaB</i>     | Putative secretion accessory protein EsaB/YukD                      | VFG002407       |
|                                                                                                                                              | <i>essA</i>     | Putative secretion system component EssA                            | VFG002404       |
|                                                                                                                                              | <i>essB</i>     | Putative secretion system component EssB/YukC                       | VFG002408       |
|                                                                                                                                              | <i>esxA</i>     | 6 kDa early secretory antigenic target ESAT-6 (EsxA)                | VFG002405       |
| Toxin, membrane-acting, superantigen                                                                                                         | <i>hlb</i>      | Sphingomyelinase                                                    | VFG001798       |
|                                                                                                                                              | <i>seb</i>      | Exotoxin, phage-associated superantigen enterotoxin SEB             | VFG001802       |
|                                                                                                                                              | <i>selk</i>     | Superantigen enterotoxin SEK                                        | VFG001327       |
|                                                                                                                                              | <i>selq</i>     | Exotoxin, phage-associated                                          | VFG001326       |
| Toxin, membrane-damaging, pore-forming, channel-forming involving alpha-helix-containing toxin                                               | <i>hld</i>      | RNAIII (delta-hemolysin)                                            | VFG001292       |
| Toxin, membrane-damaging, pore-forming, channel-forming involving $\beta$ -sheet-containing toxin                                            | <i>hly/ hla</i> | Cytolytic pore-forming protein, alpha-hemolysin                     | VFG001293       |
| Toxin, membrane-damaging, pore-forming, channel-forming involving $\beta$ -sheet-containing toxin ( $\beta$ -barrel), bicomponent leukocidin | <i>hlgA</i>     | Cytolytic pore-forming protein S component, gamma-hemolysin HlgA    | VFG001273       |
|                                                                                                                                              | <i>hlgB</i>     | Cytolytic pore-forming protein F component, gamma-hemolysin HlgB    | VFG001275       |
|                                                                                                                                              | <i>hlgC</i>     | Cytolytic pore-forming protein S component, gamma-hemolysin HlgC    | VFG001274       |
|                                                                                                                                              | <i>lukF-PV</i>  | Panton-Valentine leukocidin chain F precursor                       | VFG001276       |
|                                                                                                                                              | <i>lukS-PV</i>  | Panton-Valentine leukocidin chain S precursor                       | VFG001277       |

Legend: VF – virulence factor; VFG – virulence factor gene in virulence factor database, VFDB; MSCRAMM – microbial surface components recognizing adhesive matrix molecules
